# Supplementary material for: Evaluation of candidate genes associated with hepatitis A and E virus infection in Chinese Han population
Source: Virol J. 2018 Mar 20;15:47. doi: 10.1186/s12985-018-0962-2 (PMC5859746; doi:10.1186/s12985-018-0962-2)
Supplement: Supplementary file 1 — Table S1. Information about primers and probes of selected SNPs. (XLSX 10 kb) [file 12985_2018_962_MOESM1_ESM.xlsx]

## Sheet: Sheet1
Number	SNPs	Company	Catalog #	Assay ID
1	rs769214	Applied BioSystems	4351379	C___7618104_10
2	rs1001581	Applied BioSystems	4351379	C___2533721_10
3	rs1045642	Applied BioSystems	4362691	C___7586657_20
4	rs1800469	Applied BioSystems	4351379	C___8708473_10
5	rs2031920	Biosteed Biotechnologies	BS301005
6	rs1268354	Biosteed Biotechnologies	BS300932
7	rs405509	Applied BioSystems	4351379	C____905013_10
8	rs7412	Applied BioSystems	4351379	C____905013_10
9	rs769450	Biosteed Biotechnologies	BS300614
