# Supplementary material for: Evaluation of candidate genes associated with hepatitis A and E virus infection in Chinese Han population
Source: Virol J. 2018 Mar 20;15:47. doi: 10.1186/s12985-018-0962-2 (PMC5859746; doi:10.1186/s12985-018-0962-2)
Supplement: Supplementary file 3 — Table S3. Allele frequencies of selected SNPs in Chinese and US populations. (XLSX 13 kb) [file 12985_2018_962_MOESM3_ESM.xlsx]

## Sheet: Sheet1
	Table S3 Allele frequencies of selected SNPs in different population
No.	rs	Chromosome	Position	Allele	Nearby Gene	Distance (bp)	Allele	Asian	African	Hispanics American	MEX	CHD	CHB
1	rs1001581	19	48757228	C/T	XRCC1	17924||14327	C	0.597	0.6	--	0.59	0.559	0.56
2	rs1045642	7	86976581	G/A	ABCB1	5697||203919	G	0.344	0.688	0.455	0.54	0.631	0.598
3	rs1268354	11	116195788	C/T	APOA5||APOA4	-27994||-840	T	--	--	--	0.62	0.607	0.583
4	rs1800469	19	46552136	G/A	TGFB1||B9D2	-480||-30	G	0.495	0.688	--	0.63	0.418	0.53
5	rs2031920	10	135189835	C/T	OR7M1P||CYP2E1	-44471||-1022	C	0.767	0.979	--	0.87	0.8	0.735
6	rs405509	19	50100676	T/G	TOMM40||APOE	-1893||-203	G	0.978	--	--	0.52	0.341	0.31
7	rs7412	19	50103919	C/T	APOE/LOC100129500	3040/271||571/19622	C	--	--	--	0.938	0.917	0.892
8	rs769214	11	34416293	A/G	ABTB2||CAT	-80915||-761	A	--	0.659	--	0.49	0.298	0.287
9	rs769450	19	50102284	A/G	APOE	1405||2206	G	--	--	--	0.64	0.747	0.804
